# Supplementary material for: Heat Treatment of Seeds to Control Invasive Common Ragweed (Ambrosia artemisiifolia), Narrow-Leaved Ragwort (Senecio inaequidens) and Giant Hogweed (Heracleum mantegazzianum)
Source: MDPI journal article supplement (doi:10.3390/plants13030341), 2024-01-23
Supplement: s1 [file s1]

**Table S1.** Survival rates (%) of seeds of common ragweed: a) (left columns): seeds at dry or wet condition, and protected or unprotected, exposed to different dry heat treatment temperatures (60, 70, 80, 90, or 100 °C) for 0.5, 1, 3, 6, 12, 24, or 48 hours; b) (upper right columns): wet or dry seeds treated with hot steam or hot water (both at 90 °C) for 0.5, 1, 5, 10, 20, or 40 minutes; c) (lower right columns) seeds treated in the field with hot foam for 5 minutes unprotected (lying on the soil surface), covered with vegetation and leaf litter, or buried 1 cm in soil n = 100\* seeds per factor combination; 100 % mortification is marked in grey

| <i>Treatment temperature</i>           |              |      |      |      |      |                          |              |              |
|----------------------------------------|--------------|------|------|------|------|--------------------------|--------------|--------------|
| <b>DRY SEEDS</b><br><b>unprotected</b> | 100°C        | 90°C | 80°C | 70°C | 60°C | <b>DRY SEEDS</b>         | Hot<br>steam | Hot<br>water |
| <b>untreated control</b>               | <b>100.0</b> |      |      |      |      | <b>untreated control</b> | <b>98.9</b>  |              |
| <i>Treatment time</i>                  |              |      |      |      |      | <i>Treatment time</i>    |              |              |
| 0.5 hours                              | 37.4         | 40.0 | 88.0 | 94.9 | 97.0 | 0.5 minutes              | 100.0        | 6.1          |
| 1 hour                                 | 18.6         | 26.8 | 67.0 | 96.0 | 94.0 | 1 minute                 | 10.3         | 3.0          |
| 3 hours                                | 23.0         | 48.0 | 63.0 | 95.9 | 89.0 | 5 minutes                | 0.0          | 0.0          |
| 6 hours                                | 26.3         | 28.3 | 73.0 | 91.9 | 86.7 | 10 minutes               | 0.0          | 0.0          |
| 12 hours                               | 32.0         | 22.0 | 84.8 | 92.0 | 79.0 | 20 minutes               | 0.0          | 0.0          |
| 24 hours                               | 4.0          | 13.0 | 79.0 | 88.0 | 96.0 | 40 minutes               | 0.0          | 0.0          |
| 48 hours                               | 1.2          | 16.0 | 65.0 | 89.9 | 97.0 |                          |              |              |
| <b>DRY SEEDS</b><br><b>protected</b>   | 100°C        | 90°C | 80°C | 70°C | 60°C | <b>DRY SEEDS</b>         | Hot<br>foam  |              |
| <b>untreated control</b>               | <b>99.0</b>  |      |      |      |      | <b>untreated control</b> | <b>94.9</b>  |              |
| <i>Treatment time</i>                  |              |      |      |      |      | <i>Treatment</i>         |              |              |
| 0.5 hours                              | 92.9         | 86.9 | 94.9 | 94.7 | 97.8 | unprotected              | 75.0         |              |
| 1 hour                                 | 92.0         | 78.4 | 91.9 | 94.8 | 92.6 | vegetation cover         | 88.0         |              |
| 3 hours                                | 78.5         | 49.5 | 87.2 | 86.5 | 89.6 | in 1 cm soil depth       | 75.0         |              |
| 6 hours                                | 53.9         | 43.8 | 92.6 | 87.2 | 89.0 |                          |              |              |
| 12 hours                               | 33.3         | 51.0 | 82.1 | 84.4 | 92.8 |                          |              |              |
| 24 hours                               | 28.4         | 53.6 | 94.6 | 81.9 | 96.7 |                          |              |              |
| 48 hours                               | 14.9         | 40.4 | 91.3 | 73.2 | 95.8 |                          |              |              |
| <b>WET SEEDS</b><br><b>unprotected</b> | 100°C        | 90°C | 80°C | 70°C | 60°C | <b>WET SEEDS</b>         | Hot<br>steam | Hot<br>water |
| <b>untreated control</b>               | <b>97.0</b>  |      |      |      |      | <b>untreated control</b> | <b>98.9</b>  |              |
| <i>Treatment time</i>                  |              |      |      |      |      | <i>Treatment time</i>    |              |              |
| 0.5 hours                              | 48.5         | 71.1 | 87.0 | 96.9 | 95.0 | 0.5 minutes              | 85.9         | 2.0          |
| 1 hour                                 | 6.7          | 7.1  | 29.2 | 75.8 | 87.0 | 1 minute                 | 2.0          | 0.0          |
| 3 hours                                | 1.1          | 3.0  | 18.0 | 47.5 | 59.8 | 5 minutes                | 0.0          | 0.0          |
| 6 hours                                | 2.2          | 4.2  | 7.1  | 14.1 | 66.3 | 10 minutes               | 0.0          | 0.0          |
| 12 hours                               | 0.0          | 0.0  | 4.2  | 12.2 | 44.2 | 20 minutes               | 0.0          | 0.0          |
| 24 hours                               | 0.0          | 0.0  | 0.0  | 11.1 | 36.4 | 40 minutes               | 0.0          | 0.0          |
| 48 hours                               | 0.0          | 0.0  | 0.0  | 13.5 | 55.0 |                          |              |              |
| <b>WET SEEDS</b><br><b>protected</b>   | 100°C        | 90°C | 80°C | 70°C | 60°C | <b>WET SEEDS</b>         | Hot<br>foam  |              |
| <b>untreated control</b>               | <b>86.0</b>  |      |      |      |      | <b>untreated control</b> | <b>97.0</b>  |              |
| <i>Treatment time</i>                  |              |      |      |      |      | <i>Treatment</i>         |              |              |
| 0.5 hours                              | 80.4         | 94.7 | 95.8 | 94.7 | 91.6 | unprotected              | 39.5         |              |
| 1 hour                                 | 89.5         | 77.6 | 90.8 | 77.2 | 90.4 | vegetation cover         | 43.5         |              |
| 3 hours                                | 41.8         | 51.0 | 85.4 | 91.5 | 89.8 | in 1 cm soil depth       | 0.0          |              |
| 6 hours                                | 3.1          | 50.5 | 64.9 | 76.3 | 96.9 |                          |              |              |
| 12 hours                               | 0.0          | 43.9 | 70.9 | 73.7 | 85.3 |                          |              |              |
| 24 hours                               | 0.0          | 36.1 | 61.1 | 59.0 | 84.4 |                          |              |              |
| 48 hours                               | 0.0          | 15.5 | 44.8 | 64.2 | 84.5 |                          |              |              |

\*Seeds which were visibly intact but turned out to be empty when opened (no embryo developed) were excluded from the results as the viability of these seeds was not affected by the heat treatments; total number of seeds per factor combination varies between 98 and 100 seeds

**Table S2.** Survival rate (%) of dry and wet seeds of narrow-leaved ragwort (protected and unprotected) after exposure to different treatment temperatures (60, 70, 80, 90, 100°C) for 0.5, 1, 3, 6, 12, 24, and 48 hours, after treatment with hot steam and hot water (both. 90°C) for 0.5, 1, 5, 10, 20, and 40 minutes, and after treatment with hot foam for 5 minutes unprotected (lying on the soil surface), covered with surrounding vegetation or buried 1 cm in soil n= 100\* seeds per factor combination; 100 % mortification is marked in grey

| DRY SEEDS<br>unprotected | Treatment temperature |      |      |       |      | DRY SEEDS          | Hot<br>steam | Hot<br>water |
|--------------------------|-----------------------|------|------|-------|------|--------------------|--------------|--------------|
|                          | 100°C                 | 90°C | 80°C | 70°C  | 60°C |                    |              |              |
| untreated control        | 92.0                  |      |      |       |      | untreated control  | 98.0         |              |
| Treatment time           |                       |      |      |       |      | Treatment time     |              |              |
| 0.5 hours                | 67.7                  | 84.0 | 89.0 | 90.0  | 86.0 | 0.5 minutes        | 100.0        | 0.0          |
| 1 hour                   | 71.3                  | 88.0 | 90.0 | 100.0 | 85.0 | 1 minute           | 33.3         | 0.0          |
| 3 hours                  | 82.0                  | 94.1 | 90.0 | 96.0  | 85.6 | 5 minutes          | 22.0         | 0.0          |
| 6 hours                  | 49.0                  | 81.0 | 90.1 | 92.0  | 85.0 | 10 minutes         | 1.0          | 0.0          |
| 12 hours                 | 83.2                  | 80.0 | 84.0 | 99.0  | 84.3 | 20 minutes         | 0.0          | 0.0          |
| 24 hours                 | 49.0                  | 75.0 | 91.0 | 95.0  | 91.9 | 40 minutes         | 0.0          | 0.0          |
| 48 hours                 | 22.0                  | 66.3 | 82.0 | 96.0  | 88.0 |                    |              |              |
|                          |                       |      |      |       |      |                    |              |              |
| DRY SEEDS<br>protected   | Treatment temperature |      |      |       |      | DRY SEEDS          | Hot<br>foam  |              |
|                          | 100°C                 | 90°C | 80°C | 70°C  | 60°C |                    |              |              |
| untreated control        | 97.0                  |      |      |       |      | untreated control  | 95.0         |              |
| Treatment time           |                       |      |      |       |      | Treatment          |              |              |
| 0.5 hours                | 99.0                  | 94.0 | 87.1 | 100.0 | 91.0 | unprotected        | 95.0         |              |
| 1 hour                   | 94.0                  | 91.0 | 91.0 | 97.0  | 85.7 | vegetation cover   | 0.0          |              |
| 3 hours                  | 92.0                  | 88.0 | 84.0 | 97.0  | 88.0 | in 1 cm soil depth | 0.0          |              |
| 6 hours                  | 95.0                  | 84.0 | 93.0 | 94.0  | 92.0 |                    |              |              |
| 12 hours                 | 97.0                  | 86.1 | 93.0 | 95.0  | 85.1 |                    |              |              |
| 24 hours                 | 76.0                  | 83.0 | 83.0 | 98.0  | 88.9 |                    |              |              |
| 48 hours                 | 39.0                  | 68.0 | 88.0 | 93.0  | 86.1 |                    |              |              |
|                          |                       |      |      |       |      |                    |              |              |
| WET SEEDS<br>unprotected | Treatment temperature |      |      |       |      | WET SEEDS          | Hot<br>steam | Hot<br>water |
|                          | 100°C                 | 90°C | 80°C | 70°C  | 60°C |                    |              |              |
| untreated control        | 96.0                  |      |      |       |      | untreated control  | 97.0         |              |
| Treatment time           |                       |      |      |       |      | Treatment time     |              |              |
| 0.5 hours                | 0.0                   | 0.0  | 0.0  | 72.2  | 94.0 | 0.5 minutes        | 15.0         | 0.0          |
| 1 hour                   | 0.0                   | 0.0  | 0.0  | 46.0  | 82.0 | 1 minute           | 27.7         | 0.0          |
| 3 hours                  | 0.0                   | 0.0  | 0.0  | 30.0  | 98.0 | 5 minutes          | 0.0          | 0.0          |
| 6 hours                  | 0.0                   | 0.0  | 0.0  | 14.9  | 97.0 | 10 minutes         | 0.0          | 0.0          |
| 12 hours                 | 0.0                   | 0.0  | 0.0  | 56.0  | 90.0 | 20 minutes         | 0.0          | 0.0          |
| 24 hours                 | 0.0                   | 0.0  | 0.0  | 40.4  | 95.9 | 40 minutes         | 0.0          | 0.0          |
| 48 hours                 | 0.0                   | 0.0  | 0.0  | 56.0  | 88.7 |                    |              |              |
|                          |                       |      |      |       |      |                    |              |              |
| WET SEEDS<br>protected   | Treatment temperature |      |      |       |      | WET SEEDS          | Hot<br>foam  |              |
|                          | 100°C                 | 90°C | 80°C | 70°C  | 60°C |                    |              |              |
| untreated control        | 92.0                  |      |      |       |      | untreated control  | 97.0         |              |
| Treatment time           |                       |      |      |       |      | Treatment          |              |              |
| 0.5 hours                | 0.0                   | 0.0  | 28.0 | 93.0  | 84.0 | unprotected        | 49.0         |              |
| 1 hour                   | 0.0                   | 0.0  | 29.0 | 77.6  | 84.4 | vegetation cover   | 0.0          |              |
| 3 hours                  | 0.0                   | 0.0  | 38.4 | 70.0  | 94.0 | in 1 cm soil depth | 0.0          |              |
| 6 hours                  | 0.0                   | 0.0  | 45.5 | 66.0  | 96.0 |                    |              |              |
| 12 hours                 | 0.0                   | 0.0  | 23.0 | 52.0  | 86.6 |                    |              |              |
| 24 hours                 | 0.0                   | 0.0  | 29.2 | 66.0  | 82.0 |                    |              |              |
| 48 hours                 | 0.0                   | 0.0  | 37.4 | 79.2  | 88.0 |                    |              |              |

\*Seeds which were visibly intact but turned out to be empty when opened (no embryo developed) were excluded from the results as the viability of these seeds was not affected by the heat treatments; total number of seeds per factor combination varies between 97 and 100 seeds

**Table S3.** Survival rate (%) of dry and wet seeds of giant hogweed (protected and unprotected) after exposure to different treatment temperatures (60, 70, 80, 90, 100°C) for 0.5, 1, 3, 6, 12, 24, and 48 hours, after treatment with hot steam and hot water (both. 90°C) for 0.5, 1, 5, 10, 20, and 40 minutes, and after treatment with hot foam for 5 minutes unprotected (lying on the soil surface), covered with surrounding vegetation or buried 1 cm in soil n= 100\* seeds per factor combination; 100 % mortification is marked in grey

| <i>Treatment temperature</i>     |             |      |      |      |      |                          |              |              |
|----------------------------------|-------------|------|------|------|------|--------------------------|--------------|--------------|
| <b>DRY SEEDS<br/>unprotected</b> | 100°C       | 90°C | 80°C | 70°C | 60°C | <b>DRY SEEDS</b>         | Hot<br>steam | Hot<br>water |
| <b>untreated control</b>         | <b>85.0</b> |      |      |      |      | <b>untreated control</b> | <b>91.0</b>  |              |
| <i>Treatment time</i>            |             |      |      |      |      | <i>Treatment time</i>    |              |              |
| 0.5 hours                        | 67.0        | 76.0 | 82.0 | 84.7 | 91.9 | 0.5 minutes              | 84.9         | 0.0          |
| 1 hour                           | 51.0        | 72.7 | 79.8 | 79.8 | 89.8 | 1 minute                 | 56.1         | 0.0          |
| 3 hours                          | 35.0        | 62.2 | 72.3 | 75.8 | 88.8 | 5 minutes                | 0.0          | 0.0          |
| 6 hours                          | 12.1        | 60.0 | 75.3 | 83.7 | 82.8 | 10 minutes               | 0.0          | 0.0          |
| 12 hours                         | 0.0         | 47.0 | 36.4 | 79.6 | 81.0 | 20 minutes               | 0.0          | 0.0          |
| 24 hours                         | 0.0         | 7.0  | 36.0 | 79.4 | 78.0 | 40 minutes               | 0.0          | 0.0          |
| 48 hours                         | 0.0         | 0.0  | 33.0 | 64.3 | 72.0 |                          |              |              |
| <b>DRY SEEDS<br/>protected</b>   | 100°C       | 90°C | 80°C | 70°C | 60°C | <b>DRY SEEDS</b>         | Hot<br>foam  |              |
| <b>untreated control</b>         | <b>87.0</b> |      |      |      |      | <b>untreated control</b> | <b>87.0</b>  |              |
| <i>Treatment time</i>            |             |      |      |      |      | <i>Treatment</i>         |              |              |
| 0.5 hours                        | 73.0        | 85.0 | 85.9 | 85.7 | 94.9 | unprotected              | 79.8         |              |
| 1 hour                           | 54.1        | 84.0 | 83.8 | 85.9 | 92.9 | vegetation cover         | 31.0         |              |
| 3 hours                          | 43.0        | 75.0 | 76.0 | 79.6 | 84.9 | in 1 cm soil depth       | 0.0          |              |
| 6 hours                          | 22.0        | 65.3 | 70.7 | 78.8 | 82.7 |                          |              |              |
| 12 hours                         | 0.0         | 59.2 | 63.6 | 77.8 | 80.6 |                          |              |              |
| 24 hours                         | 0.0         | 8.0  | 67.7 | 72.5 | 75.5 |                          |              |              |
| 48 hours                         | 0.0         | 0.0  | 46.5 | 62.6 | 68.3 |                          |              |              |
| <b>WET SEEDS<br/>unprotected</b> | 100°C       | 90°C | 80°C | 70°C | 60°C | <b>WET SEEDS</b>         | Hot<br>steam | Hot<br>water |
| <b>untreated control</b>         | <b>86.0</b> |      |      |      |      | <b>untreated control</b> | <b>86.0</b>  |              |
| <i>Treatment time</i>            |             |      |      |      |      | <i>Treatment time</i>    |              |              |
| 0.5 hours                        | 0.0         | 13.0 | 71.0 | 67.0 | 85.0 | 0.5 minutes              | 0.0          | 0.0          |
| 1 hour                           | 0.0         | 0.0  | 65.7 | 46.9 | 83.8 | 1 minute                 | 0.0          | 0.0          |
| 3 hours                          | 0.0         | 0.0  | 0.0  | 53.0 | 70.7 | 5 minutes                | 0.0          | 0.0          |
| 6 hours                          | 0.0         | 0.0  | 0.0  | 4.1  | 76.5 | 10 minutes               | 0.0          | 0.0          |
| 12 hours                         | 0.0         | 0.0  | 0.0  | 0.0  | 73.3 | 20 minutes               | 0.0          | 0.0          |
| 24 hours                         | 0.0         | 0.0  | 0.0  | 0.0  | 60.6 | 40 minutes               | 0.0          | 0.0          |
| 48 hours                         | 0.0         | 0.0  | 0.0  | 0.0  | 61.6 |                          |              |              |
| <b>WET SEEDS<br/>protected</b>   | 100°C       | 90°C | 80°C | 70°C | 60°C | <b>WET SEEDS</b>         | Hot<br>foam  |              |
| <b>untreated control</b>         | <b>86.0</b> |      |      |      |      | <b>untreated control</b> | <b>86.0</b>  |              |
| <i>Treatment time</i>            |             |      |      |      |      | <i>Treatment</i>         |              |              |
| 0.5 hours                        | 76.0        | 78.0 | 71.0 | 91.8 | 91.9 | unprotected              | 80.0         |              |
| 1 hour                           | 0.0         | 25.3 | 65.0 | 89.8 | 88.0 | vegetation cover         | 0.0          |              |
| 3 hours                          | 0.0         | 0.0  | 0.0  | 30.3 | 87.9 | in 1 cm soil depth       | 0.0          |              |
| 6 hours                          | 0.0         | 0.0  | 0.0  | 28.6 | 74.8 |                          |              |              |
| 12 hours                         | 0.0         | 0.0  | 0.0  | 31.6 | 71.4 |                          |              |              |
| 24 hours                         | 0.0         | 0.0  | 0.0  | 31.0 | 72.7 |                          |              |              |
| 48 hours                         | 0.0         | 0.0  | 0.0  | 5.1  | 67.0 |                          |              |              |

\*Seeds which were visibly intact but turned out to be empty when opened (no embryo developed) were excluded from the results as the viability of these seeds was not affected by the heat treatments; total number of seeds per factor combination varies between 99 and 100 seeds

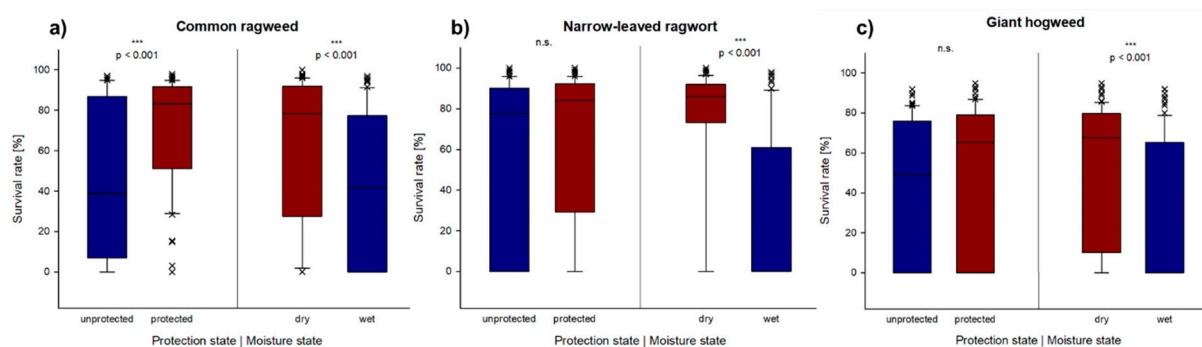

**Figure S1:** Seed survival rate (%) after dry air heat treatment in lab of a) common ragweed, b) narrow-leaved ragwort, and c) giant hogweed in relation to the seed protection state (unprotected = air heated; protected = incorporated in soil) and to the moisture
